# Supplementary material
Source: Springer Nature journal article supplement (https://www.springermedizin.de/resource/supplementary/12894_2013_291_MOESM2_ESM.pdf/9513386)
Supplement: MOESM2 [file 9513386]

Identification

Records identified through  
PUBMED searching  
(n = 123 )

Additional records identified  
through ISIWEB searching  
(n = 147)

Screening

Records after duplicates removed  
(n = 234)

Records screened  
(n = 234 )

Records excluded  
(n = 107)

Eligibility

Full-text articles assessed  
for eligibility  
(n = 127)

Full-text articles excluded,  
because non reporting  
clinical results  
(n = 95)

Included

Studies included in  
qualitative synthesis  
(n = 32)

Studies included in  
quantitative synthesis  
(meta-analysis)  
(n = )
